# Supplementary material
Source: publisher figshare collection journal article supplement (https://gsapubs.figshare.com/ndownloader/files/22409889)

Figure S-1 IODP Expedition 313 porosity vs. depth for sediments dominated by (> 50%) sands, silts and clay. Best estimate porosity vs. depth curves used by Kominz et al. (2016?) compared with ODP composite curves based on > 60% sand, > 90% silt > 90% clay. Porosity vs. depth curves were also generated testing impact of the full range of porosity data on results. These are shown for sand, silt and clay.

Figure S1 (Ms. No. GS1241R1, Kominz)

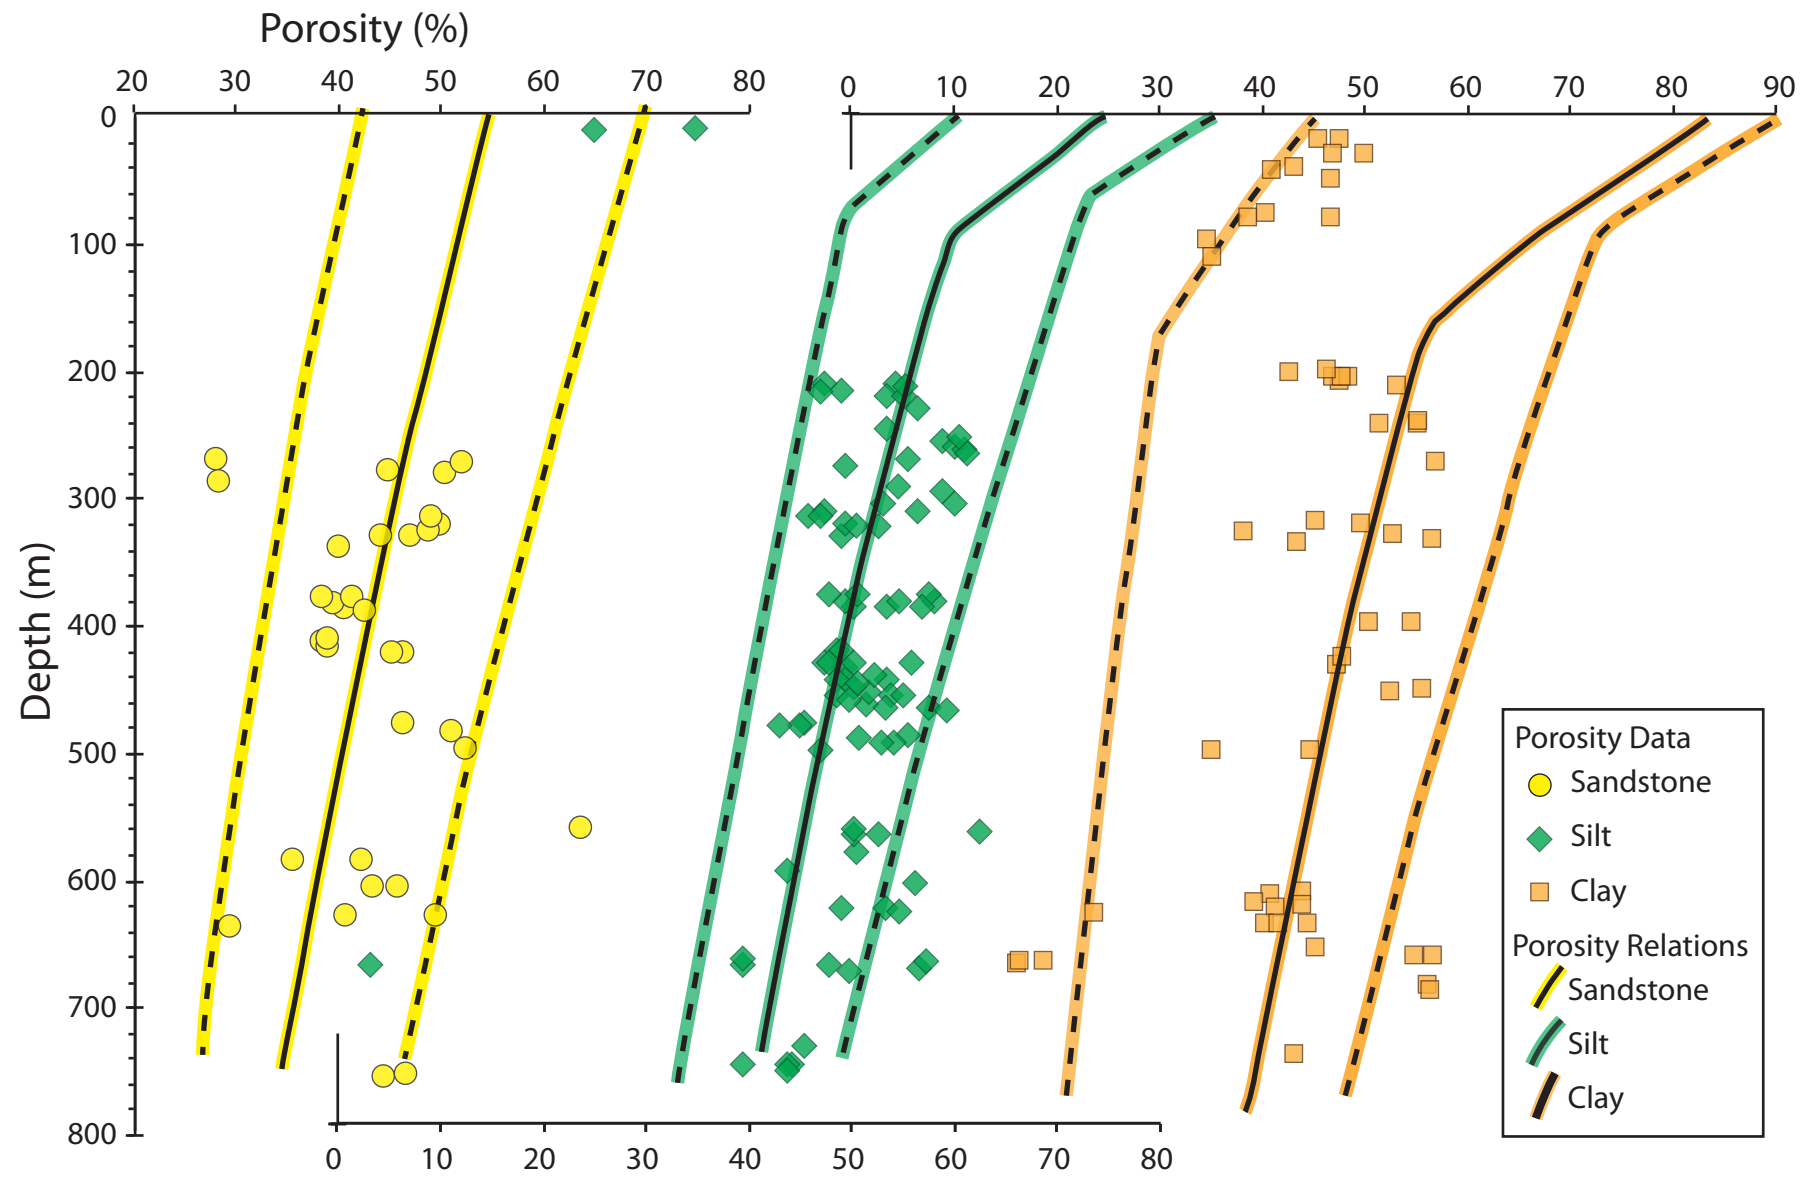

Supplement: Supplementary file 1 [file 22409889]
